# Supplementary material for: Bluetongue Disease Risk Assessment Based on Observed and Projected Culicoides obsoletus spp. Vector Densities
Source: PubMed Central journal article supplement (PMC3613389; doi:10.1371/journal.pone.0060330), 2013-04-01
Supplement: pone.0060330.s001.pdf [file pone.0060330.s001.pdf]

## Text S1

# Sensitivity study for the extrinsic incubation period and *C. obsoletus* models

Katharina Brugger\* and Franz Rubel

Institute for Veterinary Public Health, University of Veterinary Medicine Vienna,  
Veterinärplatz 1, 1210 Vienna, Austria

---

## Sensitivity study for the extrinsic incubation period

In this study the extrinsic incubation period is expressed by its reciprocal, the virus reproduction rate  $\gamma_M(T)$ . Available functional relationships are depicted in Figure S1. The sensitivity of the basic reproduction number  $R_0$  concerning the application of different temperature dependent functions  $\gamma_M(T)$  is depicted in Figure S2. The sensitivity of the Bluetongue risk assessment regarding alternative extrinsic incubation periods is low.

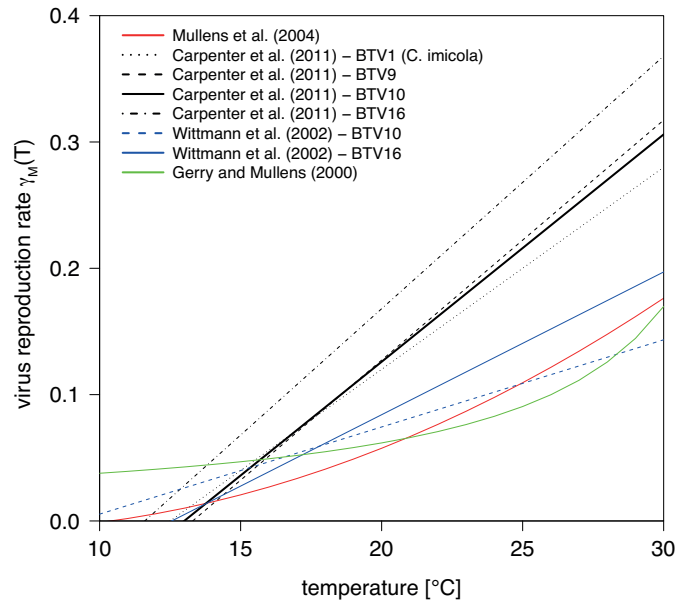

**Figure S1:** Temperature dependent virus reproduction rates  $\gamma_M(T)$ . In red after [1], in black after [2], in blue after [3], and in green after [4].

---

\*Corresponding author. Tel.: +43 1 25077 3533; Fax: +43 1 25077 3590.  
E-mail address: katharina.brugger@vetmeduni.ac.at (K. Brugger).

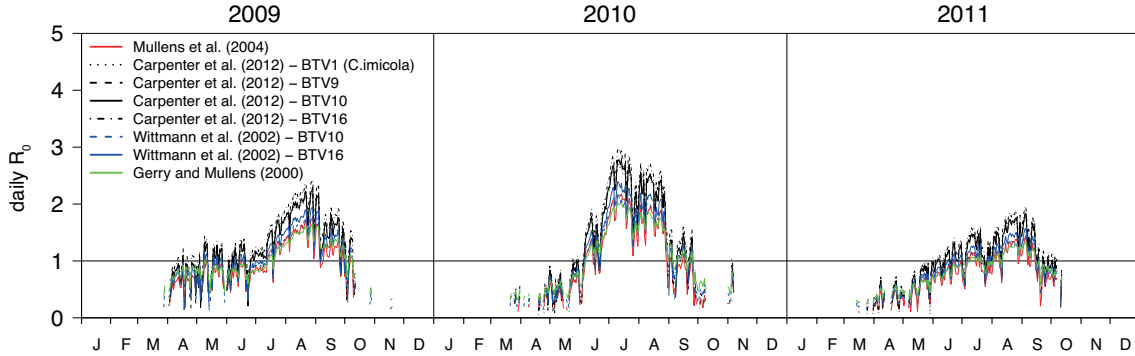

**Figure S2:** Simulated daily  $R_0$ -values for the different virus reproduction rates  $\gamma_M(T)$ . Location Vienna, period 2009-2011.

## Sensitivity study for *C. obsoletus* models

Alternatively, two linear regression models were applied to simulate *C. obsoletus* densities in unsampled regions. The first, a Poisson regression model, gives an accurate estimate of the mean but underestimates the variance. The second, a Negative Binomial regression model, avoids overdispersion but overestimates the mean (Table S1). In this study we prefer the first one. A comparison of Figures 5 and S3 demonstrates the minor impact, i.e. the low sensitivity, of the *C. obsoletus* model on the Bluetongue risk assessment. The verification of the Poisson model results in a sensitivity of 0.81 and a specificity of 0.53. Applying the Negative Binomial model leads to a slightly higher sensitivity of 0.89, but a lower specificity of 0.43.

The formula for the Negative Binomial model reads as follows

$$\log_e(n_i + 1) = -1.4991 + 0.0986 T_{i,i} + 0.1296 \bar{T}_{i-37,i} + 1.1658 \bar{P}_{i-100,i-16}, \quad (1)$$

with the daily temperature  $T$ , the mean temperature  $\bar{T}$ , and the mean logarithmic precipitation  $\bar{P}$  (all coefficients significant with  $p < 0.001$ ).

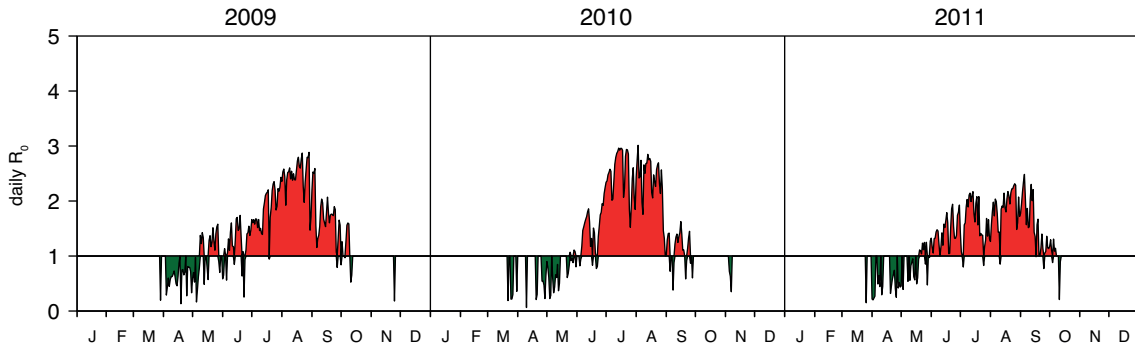

**Figure S3:** Simulated daily  $R_0$ -values based on standard parameters and *C. obsoletus* densities estimated by the Negative Binomial regression model. Location Vienna, period 2009-2011.

|                                                  | mean  | variance |
|--------------------------------------------------|-------|----------|
| observed midges                                  | 14.92 | 959.91   |
| simulated midges - Poisson regression            | 14.92 | 438.88   |
| simulated midges - Negative Binominal regression | 19.38 | 830.17   |

**Table S1:** Mean and variance estimated by the Poisson and the Negative Binominal regression model.

## References

1. Mullens B, Gerry A, Lysyk T, Schmidtman E (2004) Environment effects on vector competence and virogenesis of bluetongue virus in culicoides: interpreting laboratory data in a field of context. *Veter Ital* 40: 160-166.
2. Carpenter S, Wilson A, Barber J, Veronesi E, Mellor P, et al. (2011) Temperature dependence of the extrinsic incubation period of orbiviruses in culicoides biting midges. *PLoS ONE* 6: e27987.
3. Wittmann EJ, Mello PS, Baylis M (2002) Effect of temperature on the transmission of orbiviruses by the biting midge, *Culicoides sonorensis*. *Med Vet Entomol* 16: 147-156.
4. Gerry A, Mullens B (2000) Seasonal abundance and survivorship of *Culicoides sonorensis* (Diptera: Ceratopogonidae) at a south California dairy, with reference to potential bluetongue virus transmission and persistence. *J Med Entomol* 37: 675-688.
